# Supplementary material
Source: MDPI journal article supplement (https://www.mdpi.com/1424-8247/15/6/749)
Supplement: s1 [file s1]

**Table S1.** Quality assessment of included pediatric studies (n = 12)

| Study                     | 1. Choosing the genes/SNPs to genotype                          |                                                              |                                                     |                                                     | 2. Sample Size           |                                                          |                                                                                    | 3. Study Design           |
|---------------------------|-----------------------------------------------------------------|--------------------------------------------------------------|-----------------------------------------------------|-----------------------------------------------------|--------------------------|----------------------------------------------------------|------------------------------------------------------------------------------------|---------------------------|
|                           | Was a literature review undertaken and the findings summarized? | Are reasons given for choosing the genes and SNPs genotyped? | Is method to adjust for multiple testing described? | Are precise p-values provided for all associations? | What is the sample size? | Are details given of how the sample size was calculated? | Are details given of the a priori power to detect effect sizes of varying degrees? | What is the study design? |
| Baumann et al. (2006)     | YES                                                             | YES                                                          | NO                                                  | NO                                                  | 1                        | NO                                                       | NO                                                                                 | Case Report               |
| Prows et al. (2009)       | YES                                                             | YES                                                          | NO                                                  | YES                                                 | 279                      | NO                                                       | NO                                                                                 | Cohort study              |
| Devlin et al. (2012)      | YES                                                             | YES                                                          | NO                                                  | YES                                                 | 105                      | NO                                                       | NO                                                                                 | Case-control study        |
| Nussbaum et al. (2014) a  | YES                                                             | YES                                                          | NO                                                  | NO                                                  | 81                       | NO                                                       | NO                                                                                 | Cohort study              |
| Nussbaum et al. (2014) b  | YES                                                             | YES                                                          | NO                                                  | NO                                                  | 81                       | NO                                                       | NO                                                                                 | Cohort study              |
| Butwicka et al. (2014)    | YES                                                             | YES                                                          | NO                                                  | NO                                                  | 1                        | NO                                                       | NO                                                                                 | Case Report               |
| Cote et al. (2015)        | YES                                                             | YES                                                          | YES                                                 | YES                                                 | 134                      | NO                                                       | NO                                                                                 | Case-control study        |
| Ocete-Hita et al. (2017)  | YES                                                             | YES                                                          | YES                                                 | YES                                                 | 92                       | NO                                                       | NO                                                                                 | Case-control study        |
| Thümmeler et al. (2018)   | YES                                                             | YES                                                          | NO                                                  | NO                                                  | 9                        | NO                                                       | NO                                                                                 | Case series               |
| Grădinaru et al. (2019)   | YES                                                             | YES                                                          | NO                                                  | YES                                                 | 81                       | NO                                                       | NO                                                                                 | Cohort study              |
| Ivashchenko et al. (2020) | YES                                                             | YES                                                          | YES                                                 | YES                                                 | 53                       | NO                                                       | NO                                                                                 | Cohort study              |
| Berel et al. (2021)       | YES                                                             | YES                                                          | NO                                                  | NO                                                  | 4                        | NO                                                       | NO                                                                                 | Case series               |

**Table S1.** Quality assessment of included pediatric studies (n = 12) – continued.

| Study                     | 4. Reliability of Genotypes            |                            |                                                  |                                                          |                                                      | 5. Missing Genotype Data              |                                                                |                                                |                                   |                                                                    |
|---------------------------|----------------------------------------|----------------------------|--------------------------------------------------|----------------------------------------------------------|------------------------------------------------------|---------------------------------------|----------------------------------------------------------------|------------------------------------------------|-----------------------------------|--------------------------------------------------------------------|
|                           | Is the genotyping procedure described? | Are the primers described? | Were quality control methods used and described? | Are any genotype frequencies previously reported quoted? | Were genotyping personnel blinded to outcome status? | Is extent of missing data summarized? | Where extent is summarized are reasons for missing data given? | Are checks for missingness at random reported? | Is missing genotype data imputed? | Does paper quote number of patients contributing to each analysis? |
| Baumann et al. (2006)     | YES                                    | NO                         | NO                                               | NO                                                       | NO                                                   | NO                                    | N/A                                                            | N/A                                            | N/A                               | YES                                                                |
| Prows et al. (2009)       | YES                                    | NO                         | NO                                               | NO                                                       | NO                                                   | NO                                    | N/A                                                            | N/A                                            | N/A                               | YES                                                                |
| Devlin et al. (2012)      | YES                                    | NO                         | NO                                               | YES                                                      | NO                                                   | NO                                    | N/A                                                            | N/A                                            | N/A                               | YES                                                                |
| Nussbaum et al. (2014) a  | YES                                    | NO                         | NO                                               | YES                                                      | NO                                                   | NO                                    | N/A                                                            | N/A                                            | N/A                               | YES                                                                |
| Nussbaum et al. (2014) b  | YES                                    | NO                         | NO                                               | NO                                                       | NO                                                   | NO                                    | N/A                                                            | N/A                                            | N/A                               | YES                                                                |
| Butwicka et al. (2014)    | YES                                    | NO                         | NO                                               | NO                                                       | NO                                                   | NO                                    | N/A                                                            | N/A                                            | N/A                               | YES                                                                |
| Cote et al. (2015)        | YES                                    | NO                         | NO                                               | NO                                                       | NO                                                   | NO                                    | N/A                                                            | N/A                                            | N/A                               | YES                                                                |
| Ocete-Hita et al. (2017)  | YES                                    | NO                         | NO                                               | NO                                                       | NO                                                   | NO                                    | N/A                                                            | N/A                                            | N/A                               | YES                                                                |
| Thümmeler et al. (2018)   | YES                                    | NO                         | NO                                               | YES                                                      | NO                                                   | NO                                    | N/A                                                            | N/A                                            | N/A                               | YES                                                                |
| Grădinaru et al. (2019)   | YES                                    | NO                         | NO                                               | YES                                                      | NO                                                   | NO                                    | N/A                                                            | N/A                                            | N/A                               | YES                                                                |
| Ivashchenko et al. (2020) | YES                                    | NO                         | NO                                               | NO                                                       | NO                                                   | YES                                   | NO                                                             | N/A                                            | N/A                               | YES                                                                |
| Berel et al. (2021)       | NO                                     | NO                         | NO                                               | NO                                                       | NO                                                   | NO                                    | N/A                                                            | N/A                                            | N/A                               | YES                                                                |

**Table S1.** Quality assessment of included pediatric studies (n = 12) - continued.

| Study                     | 6. Population Stratification                                                                                   |                                                                      |                                                                          | 7. Hardy-Weinberg Equilibrium (HWE) |                                                                                                                                      | 8. Choice and Definition of Outcomes                        |                                                          |                                                  | Score |
|---------------------------|----------------------------------------------------------------------------------------------------------------|----------------------------------------------------------------------|--------------------------------------------------------------------------|-------------------------------------|--------------------------------------------------------------------------------------------------------------------------------------|-------------------------------------------------------------|----------------------------------------------------------|--------------------------------------------------|-------|
|                           | If paper does quote<br>number of patients<br>contributing to<br>analyses does this<br>agree to<br>sample size? | Are tests<br>undertaken for<br>cryptic population<br>stratification? | Is cryptic population<br>stratification adjusted for<br>in the analyses? | Was HWE<br>tested?                  | Where test undertaken,<br>are SNPs deviating<br>from HWE (or their<br>absence) highlighted<br>and excluded from<br>further analysis? | Does the paper clearly define all<br>outcomes investigated? | Is justification provided for<br>the choice of outcomes? | Are results shown for all outcomes<br>mentioned? |       |
| Baumann et al. (2006)     | YES                                                                                                            | NO                                                                   | N/A                                                                      | NO                                  | N/A                                                                                                                                  | YES                                                         | YES                                                      | YES                                              | 8     |
| Prows et al. (2009)       | YES                                                                                                            | NO                                                                   | N/A                                                                      | NO                                  | N/A                                                                                                                                  | YES                                                         | YES                                                      | YES                                              | 9     |
| Devlin et al. (2012)      | NO                                                                                                             | NO                                                                   | N/A                                                                      | NO                                  | N/A                                                                                                                                  | YES                                                         | YES                                                      | YES                                              | 9     |
| Nussbaum et al. (2014) a  | YES                                                                                                            | NO                                                                   | N/A                                                                      | NO                                  | N/A                                                                                                                                  | YES                                                         | YES                                                      | YES                                              | 9     |
| Nussbaum et al. (2014) b  | YES                                                                                                            | NO                                                                   | N/A                                                                      | NO                                  | N/A                                                                                                                                  | YES                                                         | YES                                                      | YES                                              | 8     |
| Butwicka et al. (2014)    | YES                                                                                                            | NO                                                                   | N/A                                                                      | NO                                  | N/A                                                                                                                                  | YES                                                         | YES                                                      | YES                                              | 8     |
| Cote et al. (2015)        | YES                                                                                                            | NO                                                                   | N/A                                                                      | NO                                  | N/A                                                                                                                                  | YES                                                         | YES                                                      | YES                                              | 10    |
| Ocete-Hita et al. (2017)  | YES                                                                                                            | NO                                                                   | NO                                                                       | NO                                  | N/A                                                                                                                                  | YES                                                         | YES                                                      | YES                                              | 10    |
| Thümmeler et al. (2018)   | YES                                                                                                            | NO                                                                   | N/A                                                                      | NO                                  | N/A                                                                                                                                  | YES                                                         | YES                                                      | YES                                              | 9     |
| Grădinaru et al. (2019)   | YES                                                                                                            | NO                                                                   | N/A                                                                      | NO                                  | N/A                                                                                                                                  | YES                                                         | YES                                                      | YES                                              | 10    |
| Ivashchenko et al. (2020) | YES                                                                                                            | NO                                                                   | N/A                                                                      | YES                                 | YES                                                                                                                                  | YES                                                         | YES                                                      | YES                                              | 13    |
| Berel et al. (2021)       | NO                                                                                                             | NO                                                                   | N/A                                                                      | NO                                  | N/A                                                                                                                                  | YES                                                         | YES                                                      | YES                                              | 6     |

NO = Not mentioned in the manuscript or in the Method(s) paper that the authors referenced. N/A = Not Applicable as the answer to the main question is "No".

The assessment tool was adapted from Jorgensen and Williamson (2008).

**Table S2.** Quality assessment of included mixed population studies (n = 20)

| Study                    | 1. Choosing the genes/SNPs to genotype                          |                                                              |                                                     |                                                     | 2. Sample Size           |                                                          |                                                                                    | 3. Study Design           |
|--------------------------|-----------------------------------------------------------------|--------------------------------------------------------------|-----------------------------------------------------|-----------------------------------------------------|--------------------------|----------------------------------------------------------|------------------------------------------------------------------------------------|---------------------------|
|                          | Was a literature review undertaken and the findings summarized? | Are reasons given for choosing the genes and SNPs genotyped? | Is method to adjust for multiple testing described? | Are precise p-values provided for all associations? | What is the sample size? | Are details given of how the sample size was calculated? | Are details given of the a priori power to detect effect sizes of varying degrees? | What is the study design? |
| Vandel et al. (1999)     | YES                                                             | YES                                                          | NO                                                  | NO                                                  | 65                       | NO                                                       | NO                                                                                 | Case-control study        |
| Hong et al. (2002)       | YES                                                             | YES                                                          | YES                                                 | YES                                                 | 88                       | NO                                                       | NO                                                                                 | Cohort study              |
| Mosyagin et al. (2004)   | YES                                                             | YES                                                          | NO                                                  | YES                                                 | 159                      | NO                                                       | NO                                                                                 | Case-control study        |
| Theisen et al. (2004)    | YES                                                             | YES                                                          | NO                                                  | YES                                                 | 97                       | NO                                                       | NO                                                                                 | Cohort study              |
| Kohlrausch et al. (2008) | YES                                                             | YES                                                          | NO                                                  | YES                                                 | 121                      | NO                                                       | YES                                                                                | Cohort study              |
| Godlewska et al. (2009)  | YES                                                             | YES                                                          | YES                                                 | YES                                                 | 107                      | NO                                                       | NO                                                                                 | Cohort study              |
| Le Hellard et al. (2009) | YES                                                             | YES                                                          | YES                                                 | YES                                                 | 160                      | NO                                                       | NO                                                                                 | Cohort study              |
| Tiwari et al. (2010)     | YES                                                             | YES                                                          | YES                                                 | YES                                                 | 183                      | NO                                                       | YES                                                                                | Cohort study              |
| Lencz et al. (2010)      | YES                                                             | YES                                                          | NO                                                  | YES                                                 | 58                       | NO                                                       | NO                                                                                 | Cohort study              |
| Kohlrausch et al. (2010) | YES                                                             | YES                                                          | NO                                                  | YES                                                 | 116                      | NO                                                       | NO                                                                                 | Cohort study              |
| Jassim et al. (2011)     | YES                                                             | YES                                                          | NO                                                  | YES                                                 | 160                      | NO                                                       | NO                                                                                 | Cohort study              |
| Choong et al. (2013)     | YES                                                             | YES                                                          | YES                                                 | YES                                                 | 444                      | NO                                                       | NO                                                                                 | Cohort study              |
| Gagliano et al. (2014)   | YES                                                             | YES                                                          | YES                                                 | YES                                                 | 99                       | YES                                                      | YES                                                                                | Cohort study              |
| Dong et al. (2015)       | YES                                                             | YES                                                          | YES                                                 | YES                                                 | 536                      | NO                                                       | YES                                                                                | Cohort study              |
| Pouget et al. (2015)     | YES                                                             | YES                                                          | YES                                                 | YES                                                 | 1445                     | NO                                                       | YES                                                                                | Case-control study        |
| Quteineh et al. (2015)   | YES                                                             | YES                                                          | YES                                                 | YES                                                 | 834                      | NO                                                       | NO                                                                                 | Cohort study              |
| Saigi et al. (2016)      | YES                                                             | YES                                                          | YES                                                 | YES                                                 | 750                      | NO                                                       | NO                                                                                 | Cohort study              |
| Nelson et al. (2018)     | YES                                                             | YES                                                          | NO                                                  | YES                                                 | 71                       | NO                                                       | NO                                                                                 | Case-control study        |
| Menus et al. (2020)      | YES                                                             | YES                                                          | NO                                                  | YES                                                 | 96                       | NO                                                       | NO                                                                                 | Cohort study              |
| Nicotera et al. (2021)   | YES                                                             | YES                                                          | NO                                                  | YES                                                 | 21                       | NO                                                       | NO                                                                                 | Case-control study        |

**Table S2.** Quality assessment of included mixed population studies (n = 20)

| Study                    | 4. Reliability of Genotypes            |                            |                                                  |                                                          |                                                      | 5. Missing Genotype Data              |                                                                |                                                |                                   |                                                                    |
|--------------------------|----------------------------------------|----------------------------|--------------------------------------------------|----------------------------------------------------------|------------------------------------------------------|---------------------------------------|----------------------------------------------------------------|------------------------------------------------|-----------------------------------|--------------------------------------------------------------------|
|                          | Is the genotyping procedure described? | Are the primers described? | Were quality control methods used and described? | Are any genotype frequencies previously reported quoted? | Were genotyping personnel blinded to outcome status? | Is extent of missing data summarized? | Where extent is summarized are reasons for missing data given? | Are checks for missingness at random reported? | Is missing genotype data imputed? | Does paper quote number of patients contributing to each analysis? |
| Vandel et al. (1999)     | YES                                    | NO                         | NO                                               | NO                                                       | NO                                                   | YES                                   | N/A                                                            | N/A                                            | N/A                               | YES                                                                |
| Hong et al. (2002)       | YES                                    | YES                        | NO                                               | NO                                                       | NO                                                   | NO                                    | N/A                                                            | N/A                                            | N/A                               | YES                                                                |
| Mosyagin et al. (2004)   | YES                                    | YES                        | YES                                              | YES                                                      | NO                                                   | NO                                    | N/A                                                            | N/A                                            | N/A                               | YES                                                                |
| Theisen et al. (2004)    | YES                                    | YES                        | NO                                               | YES                                                      | NO                                                   | NO                                    | N/A                                                            | N/A                                            | N/A                               | YES                                                                |
| Kohlrausch et al. (2008) | YES                                    | NO                         | NO                                               | NO                                                       | NO                                                   | NO                                    | N/A                                                            | N/A                                            | N/A                               | YES                                                                |
| Godlewska et al. (2009)  | YES                                    | YES                        | YES                                              | YES                                                      | NO                                                   | NO                                    | N/A                                                            | N/A                                            | N/A                               | YES                                                                |
| Le Hellard et al. (2009) | YES                                    | YES                        | NO                                               | NO                                                       | NO                                                   | YES                                   | YES                                                            | NO                                             | NO                                | YES                                                                |
| Tiwari et al. (2010)     | YES                                    | NO                         | YES                                              | YES                                                      | NO                                                   | YES                                   | YES                                                            | NO                                             | NO                                | YES                                                                |
| Lencz et al. (2010)      | YES                                    | NO                         | NO                                               | NO                                                       | YES                                                  | NO                                    | N/A                                                            | N/A                                            | N/A                               | YES                                                                |
| Kohlrausch et al. (2010) | YES                                    | NO                         | NO                                               | NO                                                       | NO                                                   | NO                                    | N/A                                                            | N/A                                            | N/A                               | YES                                                                |
| Jassim et al. (2011)     | YES                                    | NO                         | NO                                               | NO                                                       | NO                                                   | YES                                   | N/A                                                            | N/A                                            | N/A                               | YES                                                                |
| Choong et al. (2013)     | YES                                    | NO                         | NO                                               | NO                                                       | NO                                                   | NO                                    | N/A                                                            | N/A                                            | N/A                               | YES                                                                |
| Gagliano et al. (2014)   | YES                                    | YES                        | YES                                              | NO                                                       | NO                                                   | YES                                   | YES                                                            | NO                                             | NO                                | YES                                                                |
| Dong et al. (2015)       | YES                                    | YES                        | NO                                               | NO                                                       | NO                                                   | NO                                    | N/A                                                            | N/A                                            | N/A                               | YES                                                                |
| Pouget et al. (2015)     | YES                                    | NO                         | YES                                              | NO                                                       | NO                                                   | YES                                   | YES                                                            | NO                                             | N/A                               | YES                                                                |
| Quteineh et al. (2015)   | YES                                    | NO                         | NO                                               | NO                                                       | NO                                                   | NO                                    | N/A                                                            | N/A                                            | N/A                               | YES                                                                |
| Saigi et al. (2016)      | YES                                    | NO                         | YES                                              | NO                                                       | NO                                                   | YES                                   | YES                                                            | NO                                             | NO                                | YES                                                                |
| Nelson et al. (2018)     | YES                                    | NO                         | NO                                               | NO                                                       | NO                                                   | NO                                    | N/A                                                            | N/A                                            | N/A                               | YES                                                                |
| Menus et al. (2020)      | YES                                    | NO                         | NO                                               | YES                                                      | NO                                                   | YES                                   | YES                                                            | NO                                             | NO                                | YES                                                                |
| Nicotera et al. (2021)   | YES                                    | YES                        | NO                                               | NO                                                       | NO                                                   | NO                                    | N/A                                                            | N/A                                            | N/A                               | YES                                                                |

**Table S2.** Quality assessment of included mixed population studies (n = 20)

| Study                    | 6. Population Stratification                                                                    |                                                             |                                                                    | 7. Hardy-Weinberg Equilibrium (HWE) |                                                                                                                       | 8. Choice and Definition of Outcomes                     |                                                       |                                               | Score |
|--------------------------|-------------------------------------------------------------------------------------------------|-------------------------------------------------------------|--------------------------------------------------------------------|-------------------------------------|-----------------------------------------------------------------------------------------------------------------------|----------------------------------------------------------|-------------------------------------------------------|-----------------------------------------------|-------|
|                          | If paper does quote number of patients contributing to analyses does this agree to sample size? | Are tests undertaken for cryptic population stratification? | Is cryptic population stratification adjusted for in the analyses? | Was HWE tested?                     | Where test undertaken, are SNPs deviating from HWE (or their absence) highlighted and excluded from further analysis? | Does the paper clearly define all outcomes investigated? | Is justification provided for the choice of outcomes? | Are results shown for all outcomes mentioned? |       |
| Vandel et al. (1999)     | NO                                                                                              | NO                                                          | N/A                                                                | NO                                  | N/A                                                                                                                   | YES                                                      | YES                                                   | YES                                           | 8     |
| Hong et al. (2002)       | YES                                                                                             | NO                                                          | N/A                                                                | NO                                  | N/A                                                                                                                   | YES                                                      | YES                                                   | YES                                           | 11    |
| Mosyagin et al. (2004)   | NO                                                                                              | NO                                                          | N/A                                                                | YES                                 | YES                                                                                                                   | YES                                                      | YES                                                   | YES                                           | 13    |
| Theisen et al. (2004)    | YES                                                                                             | NO                                                          | N/A                                                                | YES                                 | YES                                                                                                                   | YES                                                      | YES                                                   | YES                                           | 11    |
| Kohlrausch et al. (2008) | YES                                                                                             | NO                                                          | N/A                                                                | YES                                 | YES                                                                                                                   | YES                                                      | YES                                                   | YES                                           | 12    |
| Godlewska et al. (2009)  | YES                                                                                             | NO                                                          | N/A                                                                | YES                                 | YES                                                                                                                   | YES                                                      | YES                                                   | YES                                           | 13    |
| Le Hellard et al. (2009) | NO                                                                                              | NO                                                          | N/A                                                                | YES                                 | YES                                                                                                                   | YES                                                      | YES                                                   | YES                                           | 14    |
| Tiwari et al. (2010)     | YES                                                                                             | NO                                                          | N/A                                                                | YES                                 | YES                                                                                                                   | YES                                                      | YES                                                   | YES                                           | 17    |
| Lencz et al. (2010)      | YES                                                                                             | NO                                                          | N/A                                                                | YES                                 | YES                                                                                                                   | YES                                                      | YES                                                   | YES                                           | 12    |
| Kohlrausch et al. (2010) | YES                                                                                             | NO                                                          | N/A                                                                | YES                                 | YES                                                                                                                   | YES                                                      | YES                                                   | YES                                           | 11    |
| Jassim et al. (2011)     | YES                                                                                             | NO                                                          | N/A                                                                | YES                                 | YES                                                                                                                   | YES                                                      | YES                                                   | YES                                           | 12    |
| Choong et al. (2013)     | YES                                                                                             | NO                                                          | N/A                                                                | YES                                 | YES                                                                                                                   | YES                                                      | YES                                                   | YES                                           | 13    |
| Gagliano et al. (2014)   | YES                                                                                             | NO                                                          | N/A                                                                | YES                                 | YES                                                                                                                   | YES                                                      | YES                                                   | YES                                           | 18    |
| Dong et al. (2015)       | YES                                                                                             | NO                                                          | N/A                                                                | YES                                 | YES                                                                                                                   | YES                                                      | YES                                                   | YES                                           | 14    |
| Pouget et al. (2015)     | YES                                                                                             | NO                                                          | N/A                                                                | YES                                 | YES                                                                                                                   | YES                                                      | YES                                                   | YES                                           | 16    |
| Quteineh et al. (2015)   | NO                                                                                              | NO                                                          | N/A                                                                | YES                                 | YES                                                                                                                   | YES                                                      | YES                                                   | YES                                           | 11    |
| Saigi et al. (2016)      | NO                                                                                              | NO                                                          | N/A                                                                | YES                                 | YES                                                                                                                   | YES                                                      | YES                                                   | YES                                           | 14    |
| Nelson et al. (2018)     | YES                                                                                             | NO                                                          | N/A                                                                | YES                                 | YES                                                                                                                   | YES                                                      | YES                                                   | YES                                           | 11    |
| Menus et al. (2020)      | NO                                                                                              | NO                                                          | N/A                                                                | NO                                  | N/A                                                                                                                   | YES                                                      | YES                                                   | YES                                           | 11    |
| Nicotera et al. (2021)   | YES                                                                                             | NO                                                          | N/A                                                                | YES                                 | NO                                                                                                                    | YES                                                      | YES                                                   | YES                                           | 11    |

NO = Not mentioned in the manuscript or in the Method(s) paper that the authors referenced. N/A = Not Applicable as the answer to the main question is "No".

The assessment tool was adapted from Jorgensen and Williamson (2008).
